# Supplementary material for: Preclinical efficacy of maternal embryonic leucine-zipper kinase (MELK) inhibition in acute myeloid leukemia
Source: PubMed Central journal article supplement (PMC4323011; doi:10.18632/oncotarget.2642), 2014-10-28
Supplement: oncotarget-05-12371-s001.pdf [file oncotarget-05-12371-s001.pdf]

# Preclinical efficacy of maternal embryonic leucine-zipper kinase (MELK) inhibition in acute myeloid leukemia

## Supplementary Material

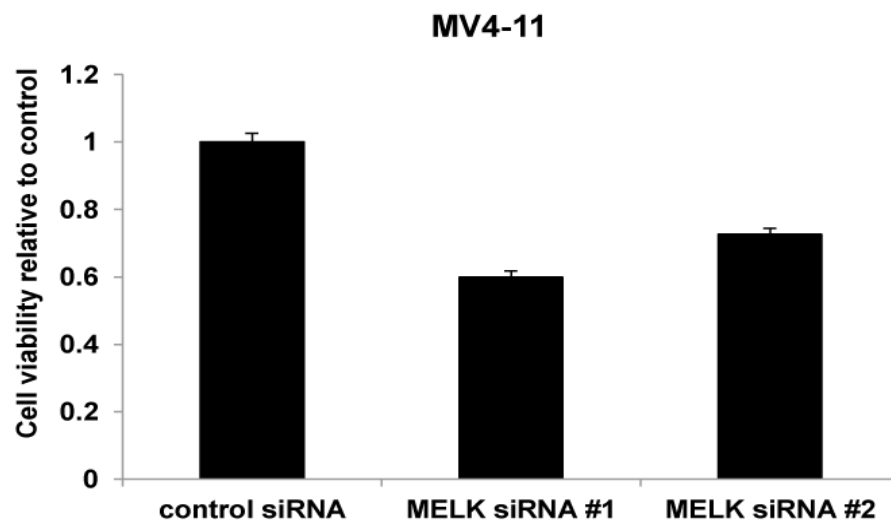

**Figure S1: MELK knock-down decreased cell viability.** MV4-11 cell transfected with two different siRNAs against MELK and cell viability was assessed by MTT assay 48 hours later.

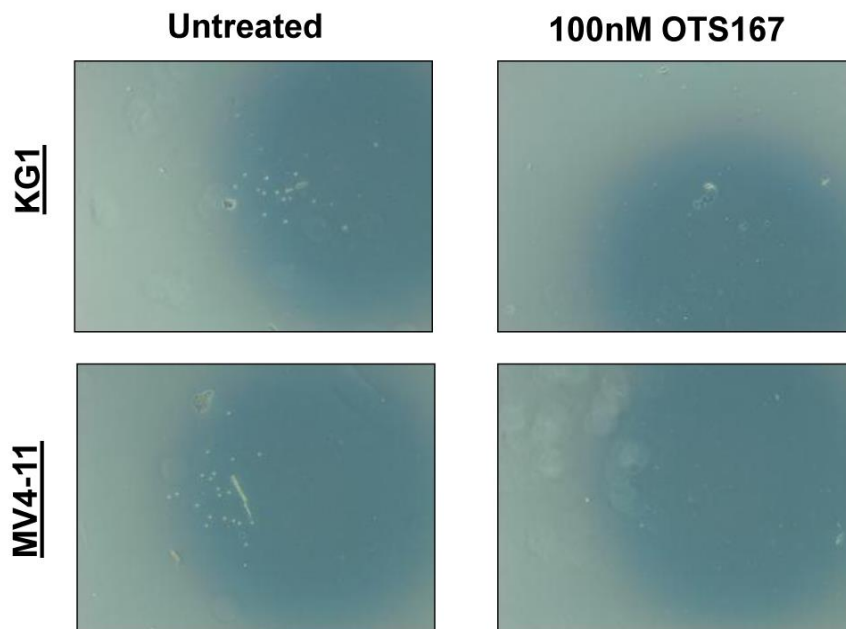

**Figure S2: MELK inhibitor OTS167 reduces cell migration.** KG1 and MV4-11 cells were treated with 100nM of OTS167 for 6 hours, then cell migration was assessed in trans-well plate, image shows cells in the bottom well.

**(12 hours)**

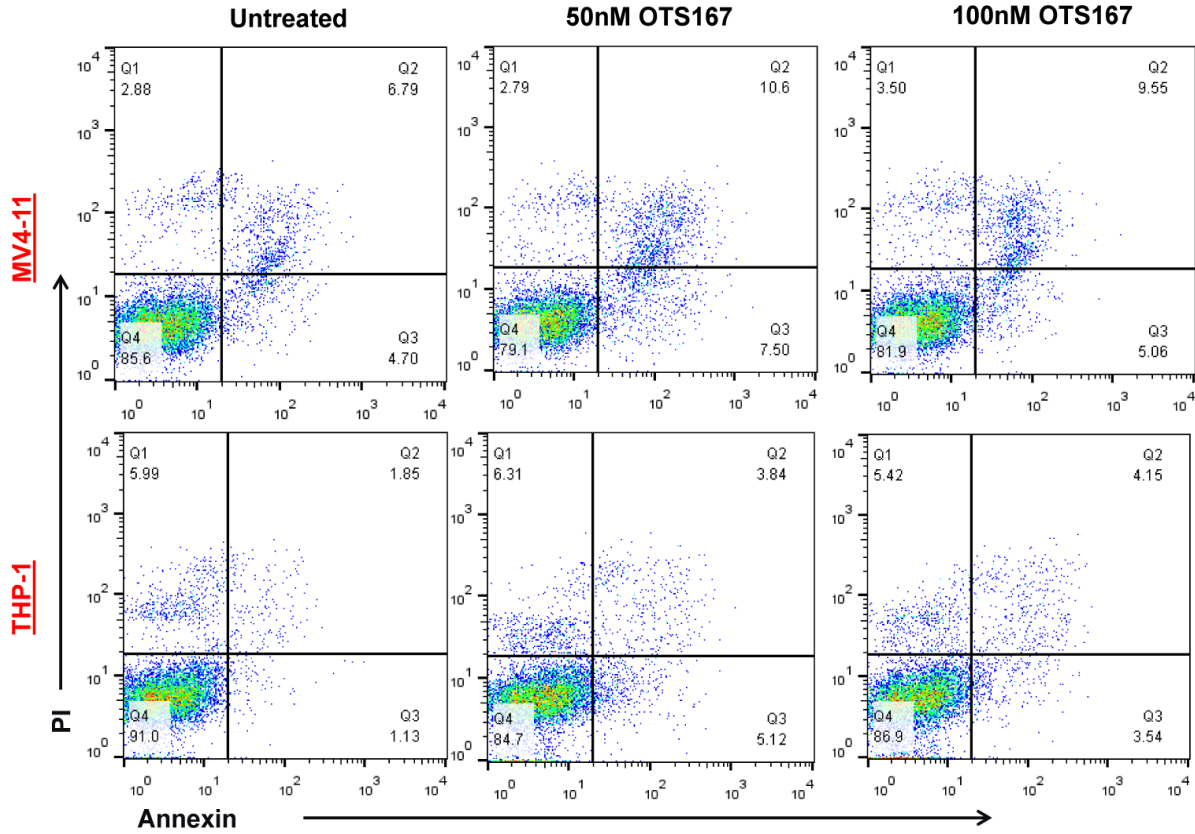

**Figure S3: The effect of MELK inhibitor OTS167 on cell apoptosis 12 hours following treatment. MV4-11 and THP-1 cells were treated with 50 and 100nM of OTS167 for 12 hours, then apoptosis was assessed by Annexin and PI staining.**

**24 hours**

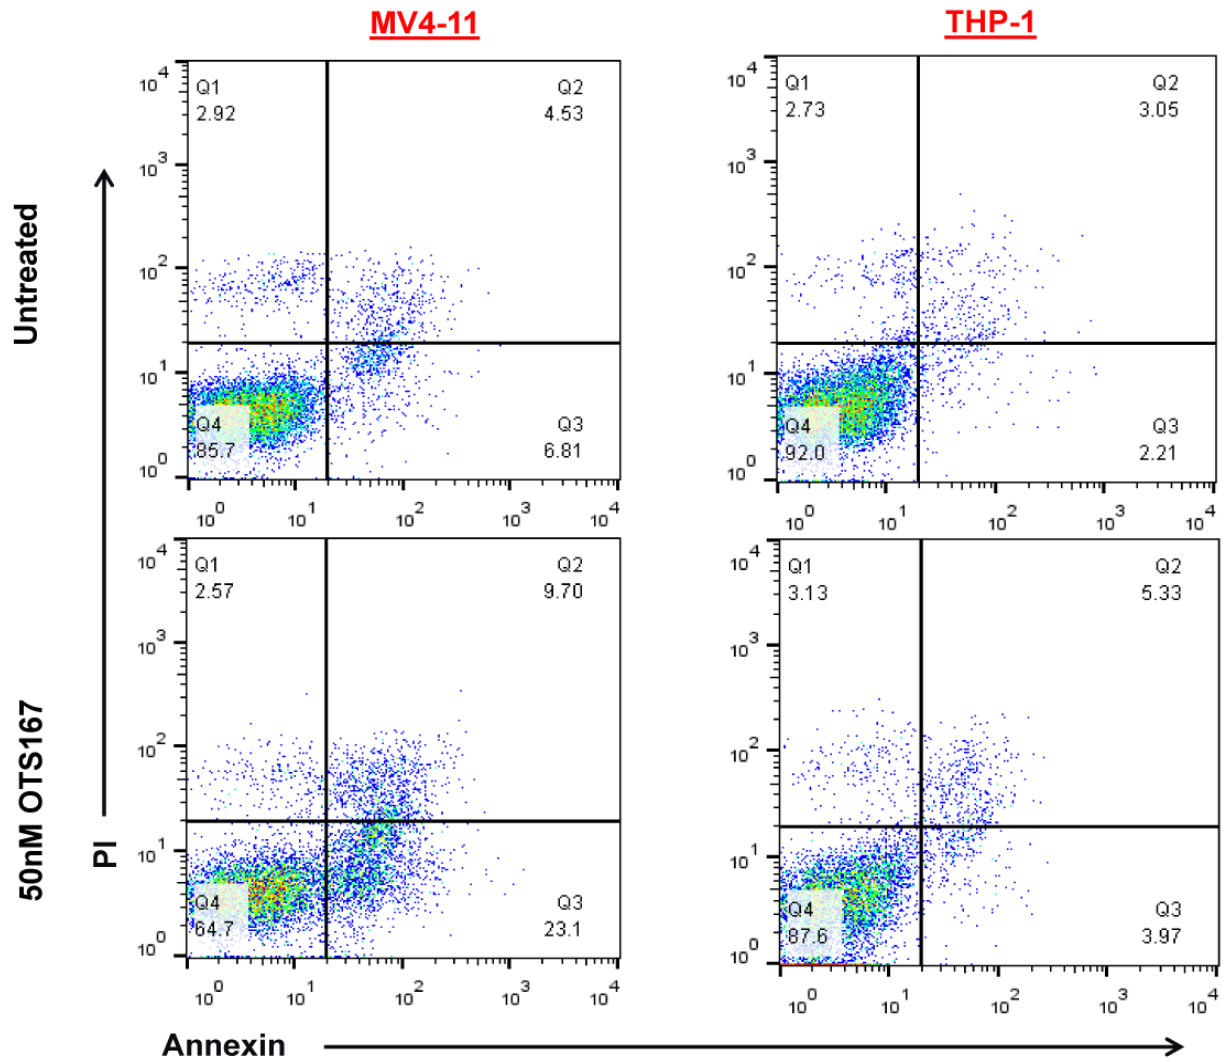

**Figure S4: The effect of MELK inhibitor OTS167 on cell apoptosis 24 hours following treatment. MV4-11 and THP-1 cells were treated with 50nM OTS167 for 24 hours, then apoptosis was assessed by Annexin and PI staining.**

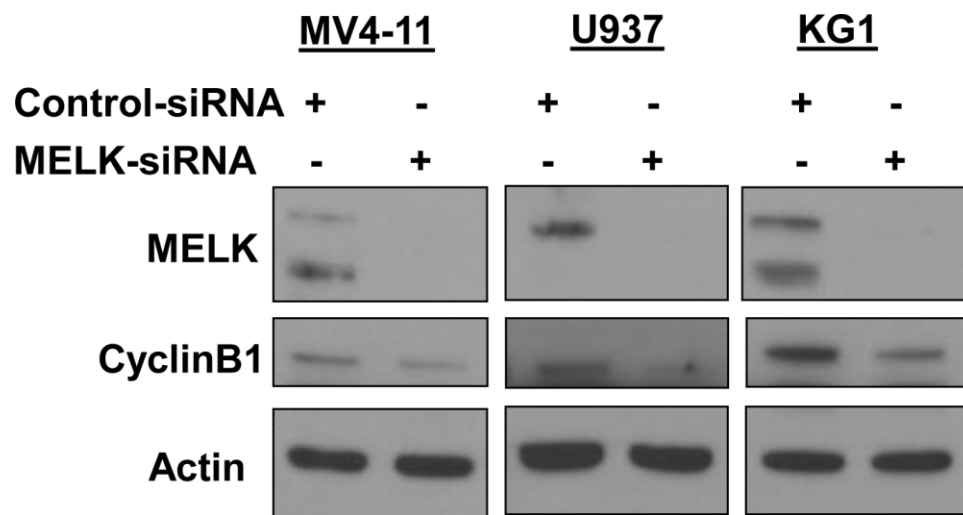

**Figure S5: The effect of MELK inhibition on CyclinB1 expression.** MV4-11, U937 and KG1 cells were transfected with MELK-siRNA, and cyclinB1 expression was assessed 48 hours following transfection.
